# Supplementary material for: Antifungal Susceptibility and Candida sp. Biofilm Production in Clinical Isolates of HIV-Positive Brazilian Patients under HAART Therapy
Source: MDPI journal article supplement (doi:10.3390/biomedicines12020310), 2024-01-29
Supplement: s1 [file s1]

**Table S1.** Characteristics and lifestyle habits of the participants according to Silva et al. [14].

| Variables            | N  | %    |
|----------------------|----|------|
| Physical exercise    |    |      |
| Yes                  | 37 | 35   |
| No                   | 69 | 65   |
| Relationship status  |    |      |
| Married              | 36 | 34   |
| Single               | 43 | 40.6 |
| Widower              | 03 | 2.8  |
| Divorced             | 10 | 9.4  |
| Partner              | 14 | 13.2 |
| Employment status    |    |      |
| Employed             | 36 | 34   |
| Unemployed           | 03 | 2.8  |
| Student              | 10 | 9.4  |
| Others               | 57 | 53.8 |
| Social class         |    |      |
| Lower (<\$1500)      | 77 | 72.6 |
| Middle (\$1500–4500) | 26 | 24.5 |
| Upper (>\$4500)      | 03 | 2.8  |

**Table S2.** Clinical characteristics of the participants according to Silva et al. [14].

| Variables                        | N  | %    |
|----------------------------------|----|------|
| TCD4 counts                      |    |      |
| $\geq 200$ cells/mm <sup>3</sup> | 83 | 19.8 |
| <200 cells/mm <sup>3</sup>       | 7  | 23.4 |
| TCD8 counts                      |    |      |
| $\geq 200$ cells/mm <sup>3</sup> | 65 | 35   |
| <200 cells/mm <sup>3</sup>       | 0  | 65   |

**Table S3.** Identification and Characterization of Biofilm Formation of *Candida* sp.

| Strain Code | Specie                  | O.D. <sub>570</sub> | Biofilm  | Sample    |
|-------------|-------------------------|---------------------|----------|-----------|
| H1          | <i>Candida albicans</i> | 0.315 ± 0.06        | Weak     | Oral swab |
| H3          | <i>Candida albicans</i> | 0.329 ± 0.04        | Weak     | Oral swab |
| H5          | <i>Candida albicans</i> | 0.579 ± 0.16        | Moderate | Oral swab |
| H6          | <i>Candida krusei</i>   | 1.086 ± 0.16        | Strong   | Oral swab |
| H7          | <i>Candida albicans</i> | 0.27 ± 0.03         | Weak     | Oral swab |
| H10         | <i>Candida krusei</i>   | 0.967 ± 0.09        | Strong   | Oral swab |
| H13         | <i>Candida krusei</i>   | 0.577 ± 0.16        | Moderate | Oral swab |
| H17         | <i>Candida albicans</i> | 0.577 ± 0.13        | Moderate | Oral swab |
| H18         | <i>Candida krusei</i>   | 0.458 ± 0.07        | Moderate | Oral swab |
| H19         | <i>Candida krusei</i>   | 0.485 ± 0.63        | Moderate | Oral swab |
| H37         | <i>Candida albicans</i> | 0.410 ± 0.62        | Moderate | Oral swab |
| H43         | <i>Candida albicans</i> | 0.387 ± 0.54        | Moderate | Oral swab |
| H49         | <i>Candida glabrata</i> | 0.277 ± 0.03        | Weak     | Oral swab |
| H51         | <i>Candida albicans</i> | 0.303 ± 0.54        | Moderate | Oral swab |
| H55         | <i>Candida albicans</i> | 0.348 ± 0.11        | Weak     | Oral swab |
| H68         | <i>Candida albicans</i> | 0.330 ± 0.04        | Weak     | Oral swab |
| H82         | <i>Candida albicans</i> | 0.314 ± 0.05        | Weak     | Oral swab |
| H84         | <i>Candida krusei</i>   | 0.686 ± 0.06        | Moderate | Oral swab |
| H101        | <i>Candida krusei</i>   | 0.687 ± 0.06        | Moderate | Oral swab |

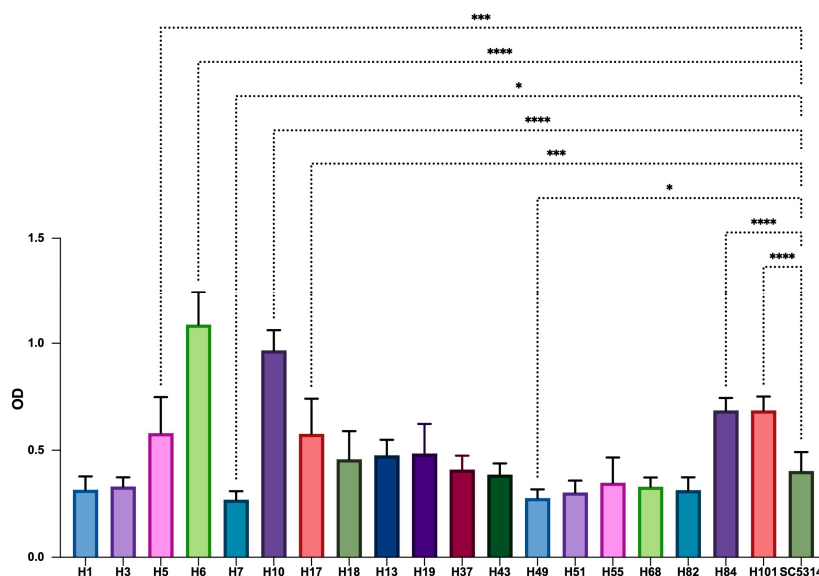

**Figure S1.** In vitro biofilm production of clinical isolates from HIV patients. Biofilm was quantified through staining with CV, after 48 h of incubation. The clinical isolates were compared with the optical density of the reference strain (*C. albicans* SC5314). Each value is the average of three independent experiments in triplicate. Error bars are the standard deviations (\*\*\*\*  $p < 0.0001$ ; \*\*\*  $p < 0.001$ ; \*  $p \geq 0.05$ ).
